# Supplementary material
Source: PubMed Central journal article supplement (PMC3475380)

A

ORNL Mice

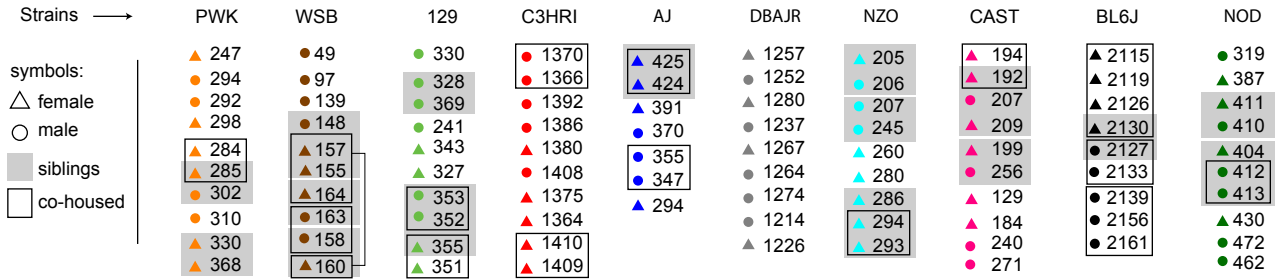

UTK Mice cohabitation

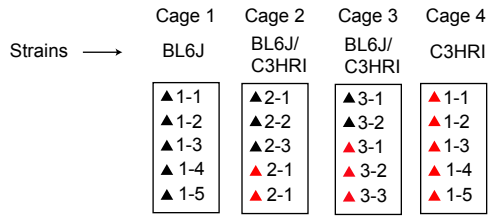

B

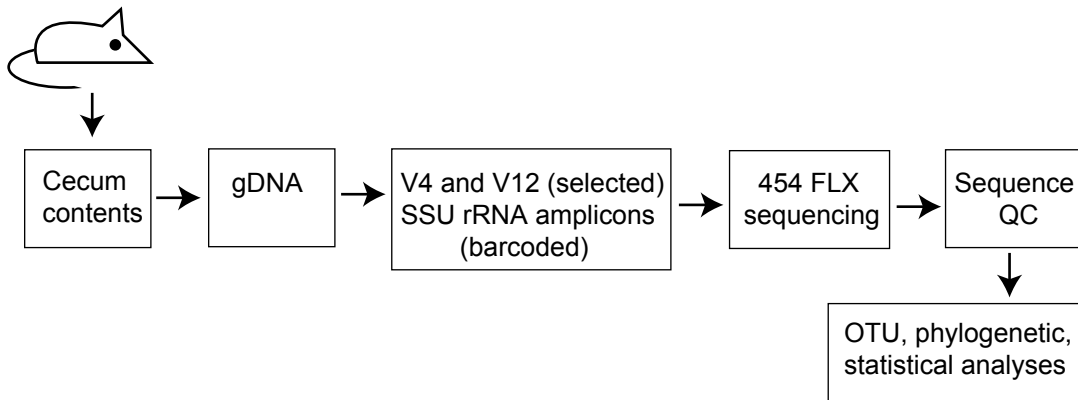

Supplement: ismej201254x1.pdf [file ismej201254x1.pdf]
